# Supplementary material
Source: PubMed Central journal article supplement (PMC5687889)
Supplement: NIHMS914070-supplement-Supplemental_Data.pdf [file NIHMS914070-supplement-Supplemental_Data.pdf]

Supp.Fig. 2

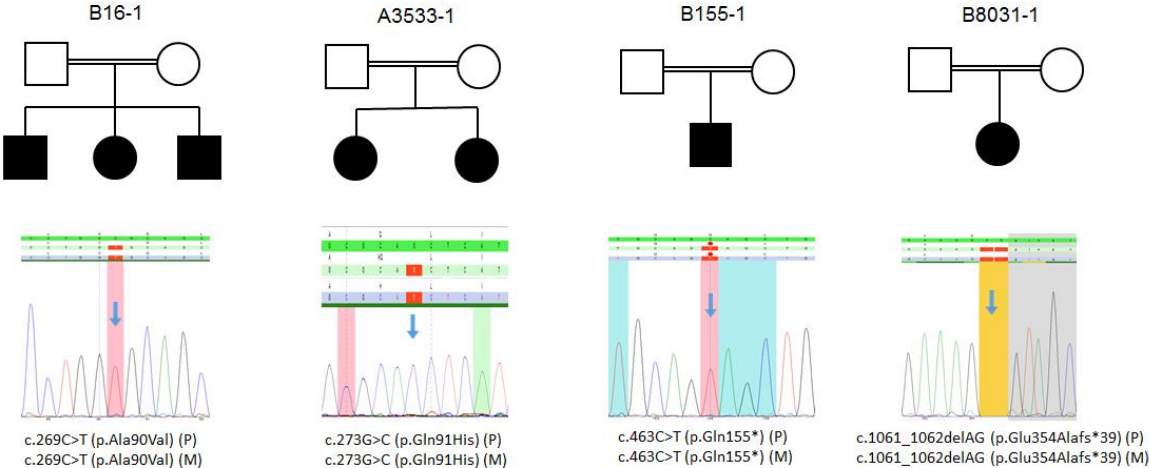

Supp.Fig. 3

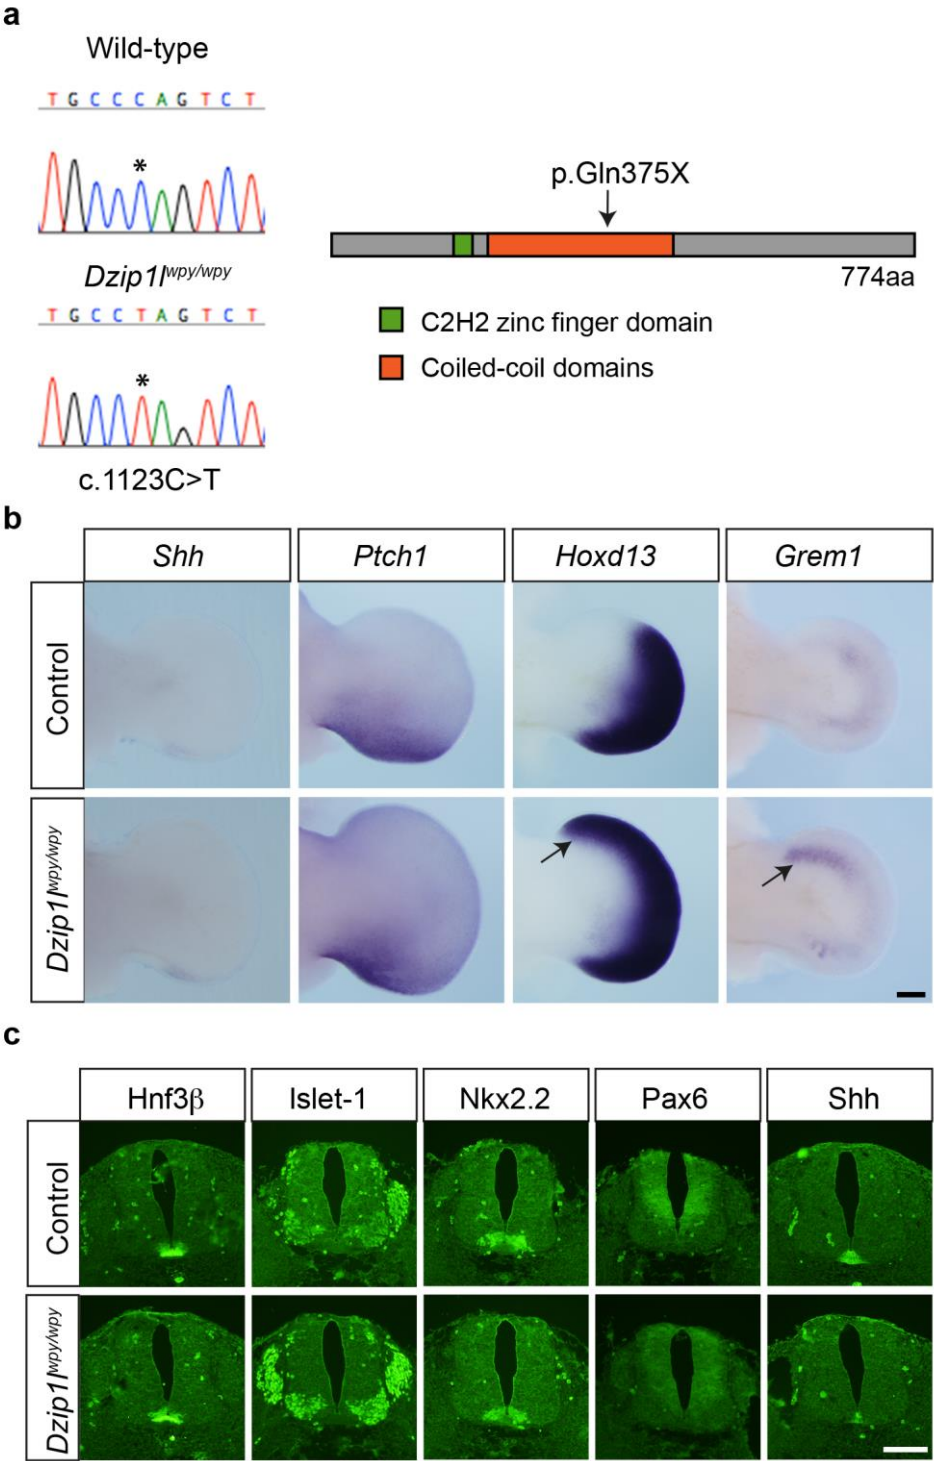

Supp.Fig. 4

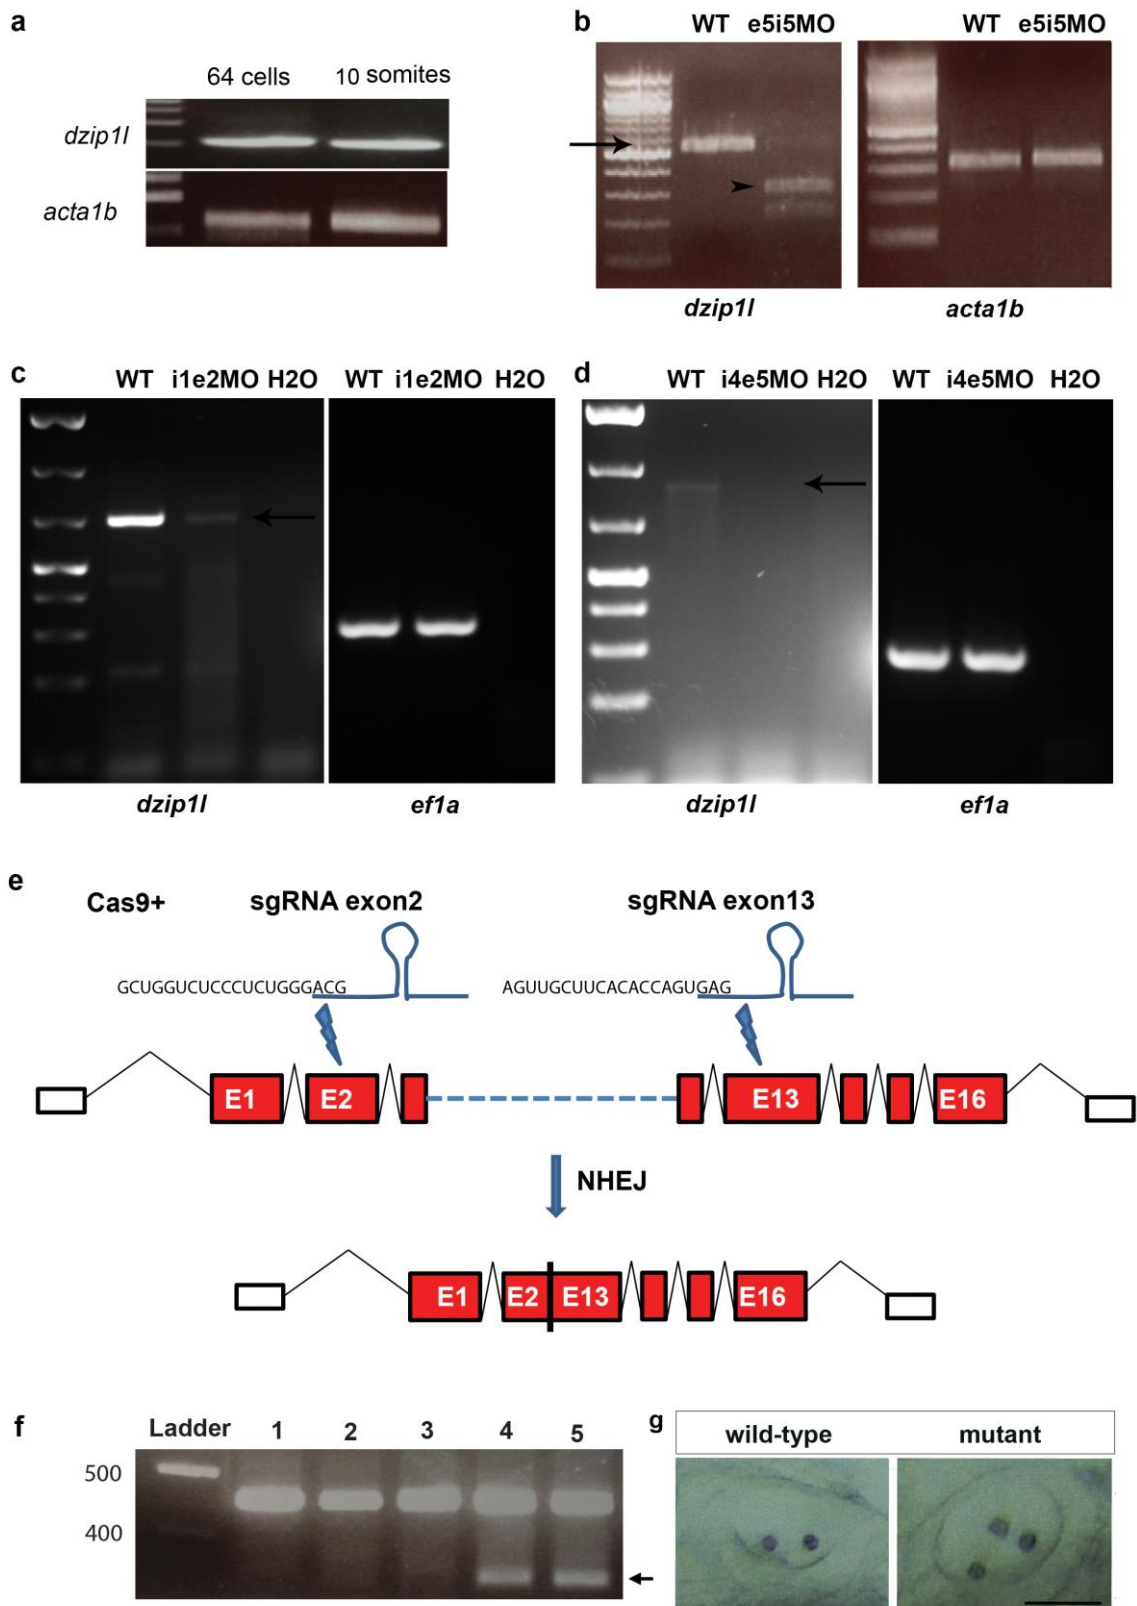

Supp.Fig. 5

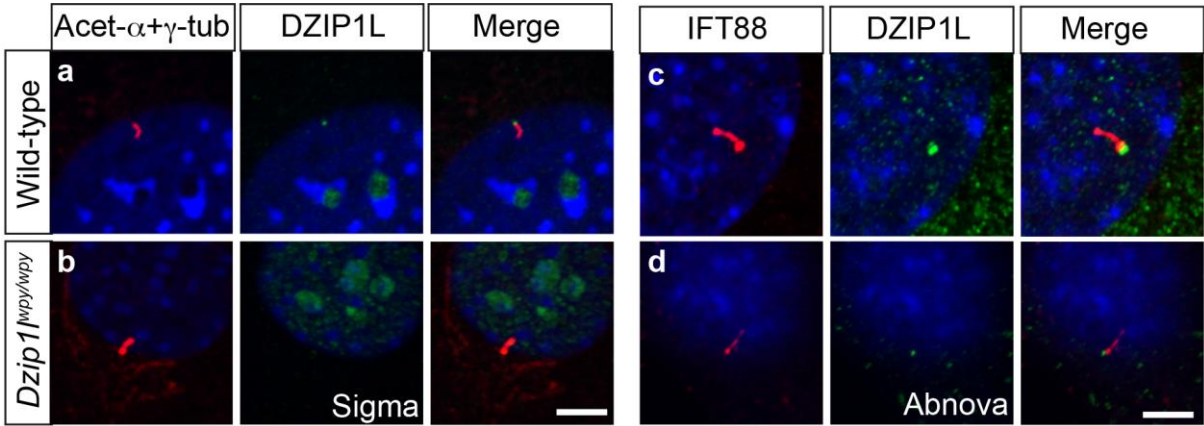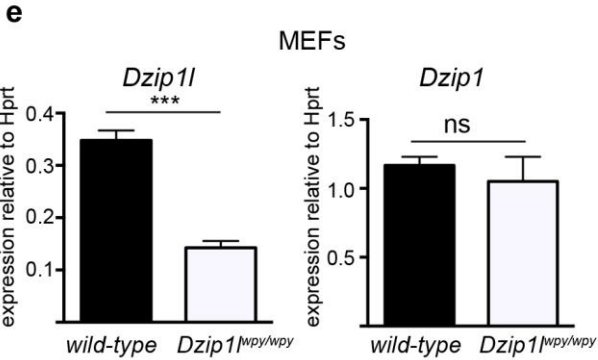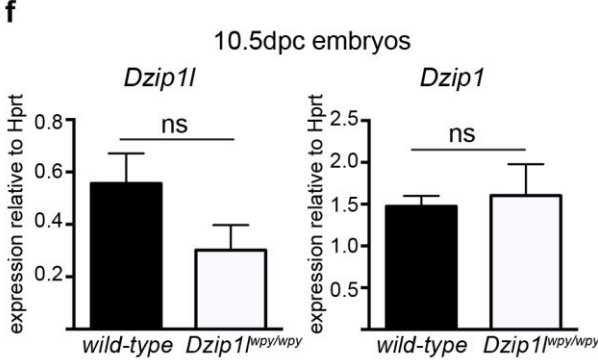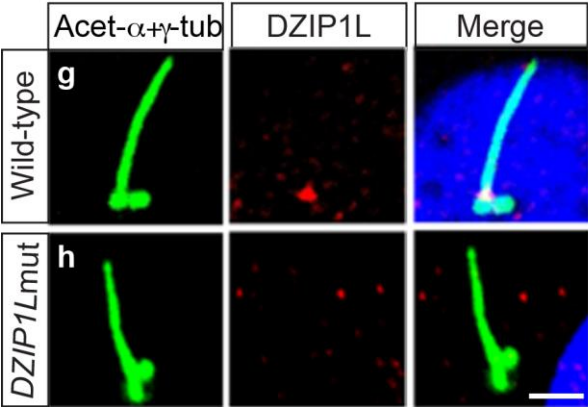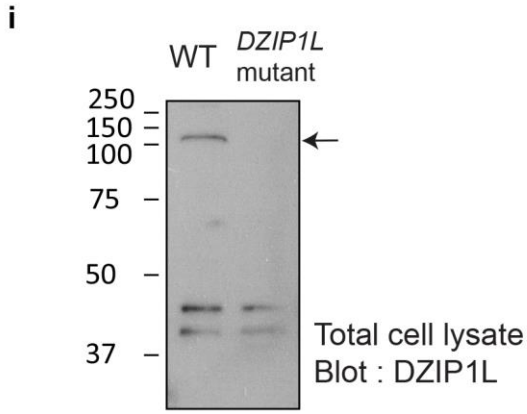

Supp.Fig. 6

a

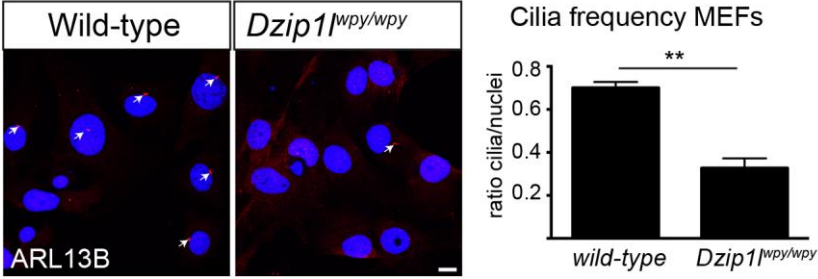

b

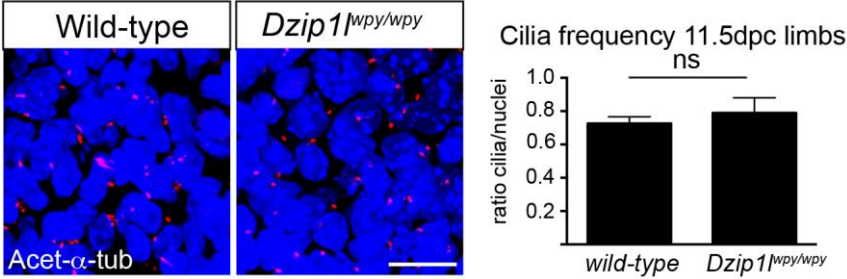

**Table S1.** Filtering process for variants from normal reference sequence (VRS) following WES in one sibling from family A3533 and in one sibling from family B16 affected with ARPKD, respectively.

| <b>FAMILY</b>                                                | <b>A3533</b>                                                                              | <b>B16</b>                                                                                                                       |
|--------------------------------------------------------------|-------------------------------------------------------------------------------------------|----------------------------------------------------------------------------------------------------------------------------------|
| <b>AFFECTED SIBLING SENT FOR WES</b>                         | <b>A3533-21</b>                                                                           | <b>B16_1859-15</b>                                                                                                               |
| Consanguinity                                                | <b>Yes</b>                                                                                | <b>Yes</b>                                                                                                                       |
| # of homozygosity peaks                                      | <b>11</b>                                                                                 | <b>13</b>                                                                                                                        |
| Cumulative<br>Homozygosity by descent [Mb]                   | <b>88.2</b>                                                                               | <b>184</b>                                                                                                                       |
| Hypothesis from mapping:<br>homozygous (H), heterozygous (h) | <b>H</b>                                                                                  | <b>H</b>                                                                                                                         |
| Total sequence reads (Mill.)                                 | <b>61</b>                                                                                 | <b>59</b>                                                                                                                        |
| Matched Reads                                                | <b>97.4%</b>                                                                              | <b>99.1%</b>                                                                                                                     |
| Total DIPs                                                   | <b>18,977</b>                                                                             | <b>11,587</b>                                                                                                                    |
| DIPS not SNP137                                              | <b>173</b>                                                                                | <b>86</b>                                                                                                                        |
| DIPS in linked region                                        | <b>32</b>                                                                                 | <b>12</b>                                                                                                                        |
| DIPS after inspection<br>and not SNP138 (>1% MAF)            | <b>2</b>                                                                                  | <b>1</b>                                                                                                                         |
| Total SNPs                                                   | <b>191,809</b>                                                                            | <b>97,850</b>                                                                                                                    |
| SNPs not SNP137                                              | <b>492</b>                                                                                | <b>726</b>                                                                                                                       |
| SNPs in linked region                                        | <b>134</b>                                                                                | <b>56</b>                                                                                                                        |
| SNPs after inspection<br>and not SNP138 (>1% MAF)            | <b>29</b>                                                                                 | <b>22</b>                                                                                                                        |
| Surviving genes                                              | <b>DZIP1L (3q22.3),<br/>SLCO4C1 (5q21.1),<br/>CARTPT (5q13.2),<br/>C10ORF27 (10q22.1)</b> | <b>DZIP1L (3q22.3),<br/>PKHD1L1 (8q23.1),<br/>FKBP6 (7q11.23),<br/>POM121C (7q11.23),<br/>DAB2 (5p13.1), MAGI2<br/>(7q21.11)</b> |

DIP, deletion/insertion polymorphism; Hom, homozygous;

| Supplementary Table 2 |                |                  |                |           |           |           |           |                |                                                              |             |           |           |           |          |            |  |
|-----------------------|----------------|------------------|----------------|-----------|-----------|-----------|-----------|----------------|--------------------------------------------------------------|-------------|-----------|-----------|-----------|----------|------------|--|
| Bait_pnid             | Bait_shortname | Bait EntrezGene# | Bait Genbank # | Bait GenP | Bait_5'aa | Bait_3'aa | Prey_pnid | Prey_shortname | Prey_name                                                    | Prey Entrez | Prey GenB | Prey GenP | Prey_5'aa | Prey3'aa | Prey_libra |  |
| 92006                 | DZIP1L         | 199221           | NM_173543      |           | 1         | 232       | 12225     | SH3D19         | SH3 domain protein D19                                       | 152503      | NM_00100  | NP_00100  | 585       | 788      | Lung       |  |
| 92006                 | DZIP1L         | 199221           | NM_173543      |           | 1         | 232       | 3273      | G2             | G2 protein; C11orf41                                         | 25758       | XM_03951  | XP_03951  | 1850      | 2237     | Brain      |  |
| 92006                 | DZIP1L         | 199221           | NM_173543      |           | 1         | 232       | 124153    | ZC3H6          | zinc finger CCH-type domain containing 6                     | 376940      | NM_19858  | NP_94098  | 373       | 672      | Testis     |  |
| 92006                 | DZIP1L         | 199221           | NM_173543      |           | 1         | 232       | 4513      | SEPT2(361)     | septin 2; DIFF6; hNedd5; KIAA0158; NEDD5; Pnutl3;            | 4735        | NM_00440  | NP_00439  | -27       | 316      | Brain      |  |
| 92006                 | DZIP1L         | 199221           | NM_173543      |           | 1         | 232       | 4513      | SEPT2(361)     | septin 2; DIFF6; hNedd5; KIAA0158; NEDD5; Pnutl3;            | 4735        | NM_00440  | NP_00439  | -20       | 362      | Brain      |  |
| 92006                 | DZIP1L         | 199221           | NM_173543      |           | 1         | 232       | 4513      | SEPT2(361)     | septin 2; DIFF6; hNedd5; KIAA0158; NEDD5; Pnutl3;            | 4735        | NM_00440  | NP_00439  | -6        | 362      | Brain      |  |
| 92006                 | DZIP1L         | 199221           | NM_173543      |           | 1         | 232       | 4513      | SEPT2(361)     | septin 2; DIFF6; hNedd5; KIAA0158; NEDD5; Pnutl3;            | 4735        | NM_00440  | NP_00439  | 21        | 362      | Brain      |  |
| 92006                 | DZIP1L         | 199221           | NM_173543      |           | 1         | 232       | 4513      | SEPT2(361)     | septin 2; DIFF6; hNedd5; KIAA0158; NEDD5; Pnutl3;            | 4735        | NM_00440  | NP_00439  | -6        | 315      | Lung       |  |
| 92006                 | DZIP1L         | 199221           | NM_173543      |           | 1         | 232       | 4513      | SEPT2(361)     | septin 2; DIFF6; hNedd5; KIAA0158; NEDD5; Pnutl3;            | 4735        | NM_00440  | NP_00439  | -6        | 362      | Lung       |  |
| 92006                 | DZIP1L         | 199221           | NM_173543      |           | 1         | 232       | 4513      | SEPT2(361)     | septin 2; DIFF6; hNedd5; KIAA0158; NEDD5; Pnutl3;            | 4735        | NM_00440  | NP_00439  | 8         | 362      | Testis     |  |
| 92006                 | DZIP1L         | 199221           | NM_173543      |           | 1         | 232       | 35454     | N4BP2          | Nedd4 binding protein 2; FLJ10680; KIAA1413                  | 55728       | NM_01817  | NP_06064  | 326       | 822      | Testis     |  |
| 92006                 | DZIP1L         | 199221           | NM_173543      |           | 1         | 232       | 5916      | SFPQ           | splicing factor proline/glutamine-rich; polypyrimidine tract | 6421        | NM_00506  | NP_00505  | 314       | 609      | Brain      |  |
| 92006                 | DZIP1L         | 199221           | NM_173543      |           | 1         | 232       | 7265      | TGFB11(44)     | transforming growth factor beta-1-induced transcript 1 prote | 7041        | NM_01592  | NP_05701  | 88        | 279      | Lung       |  |
| 92006                 | DZIP1L         | 199221           | NM_173543      |           | 1         | 232       | 8178      | PLOD3          | procollagen-lysine, 2-oxoglutarate 5-dioxygenase 3           | 8985        | NM_00108  | NP_00107  | 334       | 528      | Lung       |  |
| 92006                 | DZIP1L         | 199221           | NM_173543      |           | 1         | 232       | 35569     | DLG5           | discs, large homolog 5; placenta and prostate DLG; PDLG; KIA | 9231        | NM_00474  | NP_00473  | 26        | 360      | Brain      |  |
| 92006                 | DZIP1L         | 199221           | NM_173543      |           | 1         | 232       | 3555      | TRIP11         | thyroid hormone receptor interactor 11; CEV14; TRIP230; GMAP | 9321        | NM_00423  | NP_00423  | 1538      | 1715     | Testis     |  |
| 92006                 | DZIP1L         | 199221           | NM_173543      |           | 1         | 232       | 3135      | CIR1(450)      | CBF1 interacting corepressor; CIR;                           | 9541        | NM_00488  | NP_00487  | 124       | 248      | Lung       |  |
| 92006                 | DZIP1L         | 199221           | NM_173543      |           | 1         | 232       | 3135      | CIR1(450)      | CBF1 interacting corepressor; CIR;                           | 9541        | NM_00488  | NP_00487  | -8        | 249      | Testis     |  |
| 92006                 | DZIP1L         | 199221           | NM_173543      |           | 200       | 540       | 125087    | APOL3(402)     | apolipoprotein L3, isoform 1; apolipoprotein L, 3; TNF-induc | 80833       | NM_14564  | NP_66361  | 138       | 403      | Lung       |  |



**Supplementary Table 3.** List of primers used in this study

Human *DZIP1L* Primers

| Primer name          | Primer                                 | Notes                                |
|----------------------|----------------------------------------|--------------------------------------|
| <b>DZIP1L-90-5'</b>  | 5'-GTGCTGCGCCTGGTGCAGCTCATCA-3'        | Primer for mutagenesis (pA90V)       |
| <b>DZIP1L-90-3'</b>  | 5'-TGATGAGCTGCACCAGGCGCAGCAC-3'        | Primer for mutagenesis (pA90V)       |
| <b>DZIP1L-91-5'</b>  | 5'-GCTGCGCCTGGCGCACCTCATCATTGAGTA-3'   | Primer for mutagenesis (pQ91H)       |
| <b>DZIP1L-91-3'</b>  | 5'-TACTCAATGATGAGGTGCGCCAGGCGCAGC-3'   | Primer for mutagenesis (pQ91H)       |
| <b>DZIP1L-155-5'</b> | 5'-GATGATCAGCACCTGCAGTAGCTGCTAATGC-3'  | Primer for mutagenesis (pQ155X)      |
| <b>DZIP1L-155-3'</b> | 5'-GCATTAGCAGCTACTGCAGGGTGCTGATCATC-3' | Primer for mutagenesis (pQ155X)      |
| <b>DZIP1L-354-5'</b> | 5'-GGCTGAGAAGAAAGCTACAGGAGGAGAAC-3'    | Primer for mutagenesis (pE354Afs*39) |
| <b>DZIP1L-354-3'</b> | 5'-GTTCTCCTCCTGTAGCTTTCTTCTCAGCC-3'    | Primer for mutagenesis (pE354Afs*39) |
| <b>DZIP1qP-5'</b>    | 5'-GCCAAAGCCAACTATTACCAGTGC-3'         | qPCR primer for DZIP1                |
| <b>DZIP1qP-3'</b>    | 5'-TTTCTTCAGTGTGGCGGCGTTG-3'           | qPCR primer for DZIP1                |
| <b>DZIP1LqP-5'</b>   | 5'-AGGGATCCACAAGGTGCCAAAG-3'           | qPCR primer for DZIP1L               |
| <b>DZIP1LqP-3'</b>   | 5'-ATCCTGGGAGTCCTCCATCTCTTC-3'         | qPCR primer for DZIP1L               |
| <b>EF1α-5'</b>       | 5'-ATTCGGGCAAGTCCACCACTAC-3'           | qPCR primer for EF1α                 |
| <b>EF1α-3'</b>       | 5'-AAGGAGCCCTTTCCCATCTCAG-3'           | qPCR primer for EF1α                 |

### Zebrafish *Dzip1l* Primers

|                                    |                                                                                       |                                                         |
|------------------------------------|---------------------------------------------------------------------------------------|---------------------------------------------------------|
| RT- <i>dzip1l</i> -5'              | 5'-CAAAACGCGCAATCCTCA-3'                                                              | RT-PCR primer check <i>dzip1l</i> mRNA level            |
| RT- <i>dzip1l</i> -3'              | 5'-CACCACAATCCTTGTCTG-3'                                                              | RT-PCR primer to check <i>dzip1l</i> mRNA level         |
| RT- <i>actin1b</i> -5'             | 5'-GAGAAGCTGTGC-3'                                                                    | RT-PCR primer to check <i>actin1b</i> mRNA level        |
| RT- <i>actin1b</i> -3'             | 5'-GCACTTGCGGTG-3'                                                                    | RT-PCR primer to check <i>actin1b</i> mRNA level        |
| <i>dzip1l</i> -CRISPR-screening-5' | 5'-TTCCTCATCCAGCCTCTGTT-3'                                                            | Primer for screening <i>dzip1l</i> CRISPR mutant fish   |
| <i>dzip1l</i> -CRISPR-screening-3' | 5'-CACGCACAGAAGAGGACAAA-3'                                                            | Primer for screening <i>dzip1l</i> CRISPR mutant fish   |
| <i>dzip1l</i> -gRNA-exon-2         | 5'-GAAATTAATACGACTCACTATAGG<br><u>GGACCGTGTTGCTCGAGACA</u><br>GTTTTAGAGCTAGAAATAGC-3' | Underlined nucleotides are the genomic target sequences |
| <i>dzip1l</i> -gRNA-exon-13        | 5'-GAAATTAATACGACTCACTATAGG<br><u>CGGTCCAAAGCACCACTCC</u><br>GTTTTAGAGCTAGAAATAGC-3'  | Underlined nucleotides are the genomic target sequences |
| <i>dzip1l</i> -ATG MO              | 5'-CGGGTGAAAAGTGGCCCAACATGAC-3'                                                       | Translation blocking MO                                 |
| <i>dzip1l</i> -i1e2 MO             | 5'-AACAGAGGCTGGATGAGGAAAAGAA-3'                                                       | Splicing blocking MO                                    |
| <i>dzip1l</i> -i4e5 MO             | 5'-CTTGTTCTGAATTGTTTTGATGAT-3'                                                        | Splicing blocking MO                                    |
| <i>dzip1l</i> -e5i5 MO             | 5'-TTAAACCAATGTGGACTCACAGCCT-3'                                                       | Splicing blocking MO                                    |

### Mouse *Dzip1l* Primers

|                       |                            |                                  |
|-----------------------|----------------------------|----------------------------------|
| qRT- <i>Dzip1l</i> -F | 5'-TCATGAATGCCACCTTTCTC-3' | qRT-PCR primer for <i>Dzip1l</i> |
| qRT- <i>Dzip1l</i> -R | 5'-CTTCTGCTTTCCGACATCTG-3' | qRT-PCR primer for <i>Dzip1l</i> |
| qRT- <i>Dzip1</i> -F  | 5'-ACCAGTGCCATTTCTGTGAC-3' | qRT-PCR primer for <i>Dzip1</i>  |
| qRT- <i>Dzip1</i> -R  | 5'-CTGGATGTGGCTTTGTAGGA-3' | qRT-PCR primer for <i>Dzip1</i>  |

|                    |                               |                        |
|--------------------|-------------------------------|------------------------|
| qRT- <i>Hprt-F</i> | 5'-GCAGTACAGCCCCAAAATGG-3'    | qRT-PCR control primer |
| qRT- <i>Hprt-R</i> | 5'-AACAAAGTCTGGCCTGTATCCAA-3' | qRT-PCR control primer |
